# Supplementary material for: Chemical reaction mechanism of ZnO grown using DEZn and N2O in MOCVD
Source: Royal Society of Chemistry journal article supplement (doi:10.1039/c8ce01310a), 2018-01-01
Supplement: c8ce01310a1.pdf [file c8ce01310a1.pdf]

## Supporting Information for

# Chemical reaction mechanism of ZnO grown by DEZn and N<sub>2</sub>O in MOCVD

Jian Li <sup>1,a</sup>, Hanlin Gan <sup>1,b</sup>, Yifeng Xu <sup>a</sup>, Chaoyang Wang <sup>b</sup>, Yanli Pei <sup>a,c</sup>, Feng Long Gu <sup>\*b</sup>, Gang Wang <sup>\*a,c</sup>

<sup>a</sup>School of Electronics and Information Engineering, Sun Yat-sen University, Guangzhou 51000, China

<sup>b</sup>Key Laboratory of Theoretical Chemistry of Environment, Ministry of Education; School of Chemistry and Environment, South China Normal University, Guangzhou 510006, China

<sup>c</sup>State Key Laboratory of Optoelectronic Materials and Technologies, Guangzhou, 510275, China

**\*Corresponding authors. Email address: stswangg@mail.sysu.edu.cn (Gang Wang); gu@scnu.edu.cn (Feng Long Gu)**

Number of pages: 18

## Geometries Optimized at B3LYP-D3BJ/6-311++G(d,p)

Structure: IM1

-2122.571337 Hartree

0 1

|    |           |            |           |
|----|-----------|------------|-----------|
| Zn | 0.646241  | -0.547827  | -0.123600 |
| C  | 2.388175  | 0.347149   | -0.338001 |
| C  | 2.576242  | 1.599155   | 0.538504  |
| H  | 2.499785  | 0.612542   | -1.396212 |
| H  | 3.180860  | -0.380611  | -0.128680 |
| H  | 3.552854  | 2.070353   | 0.374638  |
| H  | 1.813858  | 2.355670   | 0.331967  |
| H  | 2.511017  | 1.361619   | 1.605062  |
| C  | -1.072315 | -1.494576  | 0.099525  |
| C  | -0.968310 | -3.026949  | 0.209103  |
| H  | -1.721385 | -1.229796  | -0.744921 |
| H  | -1.570645 | -1.096071  | 0.992467  |
| H  | -1.950456 | -3.498915  | 0.331168  |
| H  | -0.510052 | -3.466641  | -0.682113 |
| H  | -0.357910 | -3.3312820 | 1.064897  |
| N  | -3.196399 | 1.604708   | 0.105349  |
| N  | -2.090788 | 1.741300   | -0.040541 |
| O  | -0.920950 | 1.883401   | -0.193591 |

Structure: TS1

-2122.509485 Hartree

0 1

|    |           |           |           |
|----|-----------|-----------|-----------|
| Zn | 0.378679  | 0.066259  | -0.070689 |
| C  | -0.428322 | 1.931252  | -0.621740 |
| C  | -0.804108 | 2.769545  | 0.585126  |
| H  | -1.198405 | 1.891272  | -1.384197 |
| H  | 0.521587  | 2.236922  | -1.082654 |
| H  | -0.954625 | 3.819776  | 0.298751  |
| H  | -1.733123 | 2.412612  | 1.032262  |
| H  | -0.031090 | 2.759984  | 1.359654  |
| C  | 1.882679  | -1.127300 | 0.378878  |
| C  | 3.270883  | -0.666090 | -0.096317 |
| H  | 1.648096  | -2.112775 | -0.041251 |
| H  | 1.883156  | -1.261006 | 1.466820  |
| H  | 4.056277  | -1.377883 | 0.184268  |
| H  | 3.311821  | -0.555527 | -1.184153 |
| H  | 3.545603  | 0.301533  | 0.334359  |
| N  | -2.350973 | -2.486816 | 0.038304  |
| N  | -2.375863 | -1.373107 | 0.072191  |
| O  | -1.606074 | -0.065956 | -0.139044 |

Structure: IM2

-2122.680996 Hartree

0 1

|    |           |           |           |
|----|-----------|-----------|-----------|
| Zn | -0.349686 | 0.172464  | -0.078615 |
| C  | 1.285075  | -2.203562 | -0.301448 |
| C  | 0.187485  | -2.997202 | 0.402772  |
| H  | 2.260338  | -2.495759 | 0.110318  |
| H  | 1.298554  | -2.472695 | -1.368587 |
| H  | 0.344491  | -4.075351 | 0.294146  |
| H  | 0.167477  | -2.759495 | 1.470486  |
| H  | -0.796359 | -2.761642 | -0.021695 |
| C  | -1.922307 | 1.318218  | 0.023446  |
| C  | -3.268953 | 0.575987  | 0.030804  |
| H  | -1.874389 | 2.013155  | -0.821299 |
| H  | -1.818466 | 1.929008  | 0.926308  |
| H  | -4.110477 | 1.275259  | 0.093291  |
| H  | -3.411158 | -0.018756 | -0.876014 |
| H  | -3.353229 | -0.106592 | 0.881195  |
| N  | 1.947305  | 2.101035  | 0.123761  |
| N  | 3.028674  | 2.270602  | 0.155948  |
| O  | 1.158018  | -0.807894 | -0.152637 |

0 1

|    |           |           |           |
|----|-----------|-----------|-----------|
| Zn | -0.324744 | -0.501682 | -0.014313 |
| C  | 2.535573  | -0.055012 | 0.181237  |
| C  | 2.315380  | 1.435756  | -0.061502 |
| H  | 3.391211  | -0.394764 | -0.417210 |
| H  | 2.802922  | -0.215268 | 1.236638  |
| H  | 3.211262  | 2.015024  | 0.1849170 |
| H  | 2.065356  | 1.620465  | -1.110382 |
| H  | 1.494704  | 1.813703  | 0.560705  |
| C  | -2.257095 | -0.266302 | 0.069586  |
| C  | -2.724877 | 1.197401  | -0.002073 |
| H  | -2.607288 | -0.733568 | 0.995366  |
| H  | -2.693300 | -0.846159 | -0.750189 |
| H  | -3.817225 | 1.268384  | 0.048512  |
| H  | -2.324678 | 1.794346  | 0.822287  |
| H  | -2.412665 | 1.680056  | -0.932334 |
| O  | 1.427267  | -0.852851 | -0.166550 |

Structure: IM4

-2197.847108 Hartree

0 1

|    |           |           |           |
|----|-----------|-----------|-----------|
| Zn | 0.606187  | -0.361106 | -0.336092 |
| C  | -2.053600 | -1.530783 | -0.234753 |
| C  | -1.611585 | -2.625328 | 0.732622  |
| H  | -2.143144 | -1.953379 | -1.247081 |
| H  | -3.054642 | -1.180038 | 0.049744  |
| H  | -2.323525 | -3.457119 | 0.740965  |
| H  | -0.632981 | -3.027428 | 0.444455  |
| H  | -1.532976 | -2.228483 | 1.748652  |
| C  | 2.549559  | -0.244202 | -0.433592 |
| C  | 3.219294  | 0.243586  | 0.862562  |
| H  | 2.786952  | 0.432459  | -1.261080 |
| H  | 2.938872  | -1.226368 | -0.719033 |
| H  | 4.306597  | 0.317795  | 0.745715  |
| H  | 2.857485  | 1.231759  | 1.159478  |
| H  | 3.030303  | -0.435613 | 1.698761  |
| O  | -1.197503 | -0.411147 | -0.237787 |
| N  | -1.324788 | 2.299260  | 0.145956  |
| N  | -2.433731 | 2.409968  | 0.264346  |
| O  | -0.143861 | 2.203067  | 0.023919  |

Structure: TS2

-2197.776224 Hartree

0 1

|    |           |           |           |
|----|-----------|-----------|-----------|
| Zn | 0.256649  | -0.525686 | -0.377204 |
| C  | -2.585098 | -0.952302 | -0.161835 |
| C  | -2.589547 | -0.361339 | 1.245321  |
| H  | -3.260148 | -1.817578 | -0.191343 |
| H  | -2.989289 | -0.211442 | -0.868491 |
| H  | -3.599746 | -0.068811 | 1.549920  |
| H  | -2.209578 | -1.089650 | 1.967396  |
| H  | -1.957505 | 0.533474  | 1.294956  |
| C  | 2.323637  | -0.691381 | -0.290699 |
| C  | 2.859273  | -0.735969 | 1.125527  |
| H  | 2.829004  | 0.019741  | -0.933865 |
| H  | 2.296031  | -1.675278 | -0.779308 |
| H  | 3.904264  | -1.075129 | 1.125634  |
| H  | 2.831576  | 0.252957  | 1.584420  |
| H  | 2.299967  | -1.425298 | 1.763814  |
| O  | -1.312250 | -1.393260 | -0.581928 |
| N  | 0.136558  | 2.603555  | -0.037527 |
| N  | -0.874960 | 3.063714  | -0.068565 |
| O  | 0.971648  | 1.281095  | -0.163603 |

Structure: IM5

-2197.941368 Hartree

0 1

|    |           |           |           |
|----|-----------|-----------|-----------|
| Zn | 0.173182  | -0.246149 | -0.423874 |
| C  | -2.539812 | -1.014553 | -0.259222 |
| C  | -2.533977 | -1.163249 | 1.258273  |
| H  | -3.211734 | -1.762299 | -0.697641 |
| H  | -2.942644 | -0.026859 | -0.530609 |
| H  | -3.542427 | -1.052454 | 1.669865  |
| H  | -2.148799 | -2.145289 | 1.544319  |
| H  | -1.899864 | -0.398350 | 1.723056  |
| C  | 2.953857  | 0.220132  | 0.006863  |
| C  | 3.037855  | -1.069341 | 0.815650  |
| H  | 3.551982  | 0.997603  | 0.497838  |
| H  | 3.392057  | 0.058925  | -0.988665 |
| H  | 4.074671  | -1.405024 | 0.918362  |
| H  | 2.623013  | -0.923009 | 1.816871  |
| H  | 2.478382  | -1.875515 | 0.324257  |
| O  | -1.266026 | -1.218750 | -0.841466 |
| N  | -1.197014 | 3.246503  | 0.342367  |
| N  | -1.096263 | 2.182297  | 0.105831  |
| O  | 1.637938  | 0.728400  | -0.112059 |



Structure: IM6

-2088.376208 Hartree

0 1

|    |           |           |           |
|----|-----------|-----------|-----------|
| Zn | 0.000000  | -0.634729 | 0.000001  |
| C  | -2.749599 | 0.096076  | -0.119588 |
| C  | -2.371621 | 1.572281  | -0.080173 |
| H  | -3.635740 | -0.070518 | 0.504565  |
| H  | -3.021122 | -0.187818 | -1.146366 |
| H  | -3.197124 | 2.201108  | -0.428425 |
| H  | -2.113767 | 1.875882  | 0.938184  |
| H  | -1.509438 | 1.771641  | -0.729161 |
| C  | 2.749599  | 0.096076  | 0.119586  |
| C  | 2.371621  | 1.572281  | 0.080173  |
| H  | 3.635739  | -0.070517 | -0.504569 |
| H  | 3.021124  | -0.187820 | 1.146363  |
| H  | 3.197125  | 2.201107  | 0.428425  |
| H  | 2.113765  | 1.875884  | -0.938182 |
| H  | 1.509440  | 1.771640  | 0.729164  |
| O  | -1.735829 | -0.759937 | 0.376608  |
| O  | 1.735828  | -0.759937 | -0.376609 |

Structure: TS3

-2088.374458 Hartree

0 1

|    |           |           |           |
|----|-----------|-----------|-----------|
| Zn | -0.131815 | -0.544841 | -0.026218 |
| C  | 2.608692  | 0.103094  | 0.550107  |
| C  | 3.473798  | 1.012446  | -0.310610 |
| H  | 3.232676  | -0.669726 | 1.018252  |
| H  | 2.160244  | 0.686505  | 1.366395  |
| H  | 3.928054  | 0.440241  | -1.122910 |
| H  | 2.873337  | 1.812949  | -0.751578 |
| H  | 4.272492  | 1.465861  | 0.285578  |
| O  | 1.627574  | -0.541850 | -0.252446 |
| O  | -1.887222 | -0.768784 | 0.163050  |
| C  | -2.882658 | 0.159995  | -0.228999 |
| H  | -3.057560 | 0.098472  | -1.312516 |
| H  | -3.811879 | -0.148732 | 0.264660  |
| C  | -2.557677 | 1.598518  | 0.156101  |
| H  | -3.371099 | 2.275844  | -0.122635 |
| H  | -2.396142 | 1.680379  | 1.234481  |
| H  | -1.651410 | 1.944177  | -0.357617 |

Structure: IM7

-2088.375154 Hartree

0 1

|    |           |           |           |
|----|-----------|-----------|-----------|
| Zn | -0.142579 | -0.429297 | 0.007229  |
| C  | 2.512829  | 0.566299  | 0.390570  |
| C  | 3.903222  | 0.366336  | -0.191734 |
| H  | 2.527970  | 0.341077  | 1.466638  |
| H  | 2.217269  | 1.620123  | 0.284362  |
| H  | 4.217833  | -0.673397 | -0.074580 |
| H  | 3.906756  | 0.606893  | -1.257555 |
| H  | 4.629722  | 1.010297  | 0.314269  |
| O  | 1.603497  | -0.287328 | -0.293530 |
| O  | -1.857881 | -0.808338 | 0.293504  |
| C  | -2.961159 | -0.058953 | -0.183883 |
| H  | -3.161893 | -0.303693 | -1.236586 |
| H  | -3.835115 | -0.383034 | 0.393787  |
| C  | -2.784407 | 1.447532  | -0.033575 |
| H  | -3.675826 | 1.985837  | -0.370796 |
| H  | -2.598772 | 1.710240  | 1.011535  |
| H  | -1.938404 | 1.802614  | -0.636013 |

Structure: TS4

-2088.279394 Hartree

0 1

|    |           |           |           |
|----|-----------|-----------|-----------|
| Zn | -0.164757 | -0.376177 | 0.005865  |
| C  | 2.969071  | 0.640036  | 0.593429  |
| C  | 3.911503  | 0.187210  | -0.384842 |
| H  | 2.931411  | 0.159432  | 1.565996  |
| H  | 2.667318  | 1.682541  | 0.606883  |
| H  | 2.576082  | -0.339169 | -0.849984 |
| H  | 4.312165  | 0.913907  | -1.083540 |
| H  | 4.578498  | -0.624512 | -0.114606 |
| O  | 1.612493  | -0.095908 | -0.208797 |
| O  | -1.869172 | -0.813280 | 0.317056  |
| C  | -3.014529 | -0.140224 | -0.173077 |
| H  | -3.210511 | -0.429221 | -1.215476 |
| H  | -3.866020 | -0.491649 | 0.422286  |
| C  | -2.918533 | 1.377903  | -0.072766 |
| H  | -3.841261 | 1.855469  | -0.417367 |
| H  | -2.738406 | 1.683787  | 0.961499  |
| H  | -2.098191 | 1.758682  | -0.694180 |

Structure: IM8

-2088.358796 Hartree

0 1

|    |           |           |           |
|----|-----------|-----------|-----------|
| Zn | -0.281490 | 0.265032  | 0.357964  |
| C  | 3.918124  | -0.807322 | 0.220789  |
| C  | 4.019220  | -0.284734 | -0.998658 |
| H  | 3.506198  | -1.797808 | 0.384193  |
| H  | 4.248601  | -0.267497 | 1.101744  |
| H  | 1.984509  | 0.741831  | -0.021599 |
| H  | 4.436020  | 0.703263  | -1.162796 |
| H  | 3.692777  | -0.826498 | -1.880116 |
| O  | 1.189685  | 1.249805  | 0.180850  |
| O  | -1.774773 | -0.633979 | 0.720261  |
| C  | -2.820457 | -0.908237 | -0.194761 |
| H  | -2.548004 | -1.750696 | -0.846860 |
| H  | -3.683072 | -1.230554 | 0.400857  |
| C  | -3.213162 | 0.292539  | -1.047411 |
| H  | -4.052465 | 0.050597  | -1.707210 |
| H  | -3.504917 | 1.134566  | -0.413944 |
| H  | -2.376571 | 0.611748  | -1.681825 |

Structure: IM9

-2009.734049 Hartree

0 1

|    |           |           |           |
|----|-----------|-----------|-----------|
| Zn | -0.752913 | -0.143408 | -0.012708 |
| H  | -2.953324 | 0.341243  | 0.715546  |
| O  | -2.379747 | 0.584796  | -0.016330 |
| O  | 0.829526  | -0.929019 | -0.214417 |
| C  | 2.074061  | -0.413133 | 0.225786  |
| H  | 2.203089  | -0.594185 | 1.302360  |
| H  | 2.851400  | -0.987726 | -0.291768 |
| C  | 2.256378  | 1.070432  | -0.070561 |
| H  | 3.245951  | 1.416889  | 0.243779  |
| H  | 2.147853  | 1.264912  | -1.140975 |
| H  | 1.511544  | 1.671085  | 0.466948  |

Structure: TS5

-2009.732378 Hartree

0 1

|    |           |           |           |
|----|-----------|-----------|-----------|
| Zn | 0.874690  | 0.046372  | -0.065166 |
| C  | -1.936050 | 0.445700  | 0.397009  |
| C  | -3.008180 | -0.555824 | -0.006806 |
| H  | -2.335970 | 1.466111  | 0.331461  |
| H  | -1.654359 | 0.280821  | 1.446161  |
| H  | -3.298959 | -0.396180 | -1.047709 |
| H  | -2.636845 | -1.579589 | 0.090744  |
| H  | -3.896528 | -0.447168 | 0.623986  |
| O  | -0.820640 | 0.347854  | -0.481179 |
| O  | 2.578502  | -0.396497 | 0.207722  |
| H  | 3.184455  | 0.334735  | 0.356763  |

Structure: IM10

-2009.733083 Hartree

0 1

|    |           |           |           |
|----|-----------|-----------|-----------|
| Zn | 0.905035  | -0.058567 | -0.012876 |
| C  | -1.889829 | 0.564184  | -0.004890 |
| C  | -3.220137 | -0.171777 | 0.014097  |
| H  | -1.836749 | 1.207263  | -0.895016 |
| H  | -1.818515 | 1.220259  | 0.874230  |
| H  | -3.312435 | -0.812681 | -0.865959 |
| H  | -3.293585 | -0.800351 | 0.904699  |
| H  | -4.053265 | 0.538373  | 0.018099  |
| O  | -0.837981 | -0.394595 | -0.008819 |
| O  | 2.671021  | 0.127383  | 0.132396  |
| H  | 3.158993  | 0.187401  | -0.693624 |



Structure: TS6

-2009.637454 Hartree

0 1

|    |           |           |           |
|----|-----------|-----------|-----------|
| Zn | -0.945176 | -0.056523 | 0.025163  |
| C  | 2.316882  | 0.750670  | 0.002908  |
| C  | 3.173139  | -0.393416 | -0.054506 |
| H  | 2.226199  | 1.310993  | 0.927666  |
| H  | 2.146669  | 1.342112  | -0.890877 |
| H  | 1.786331  | -0.955587 | -0.005280 |
| H  | 3.651215  | -0.627802 | -0.999616 |
| H  | 3.731614  | -0.659929 | 0.836440  |
| O  | 0.855681  | -0.216429 | 0.055114  |
| O  | -2.716490 | 0.101983  | -0.173293 |
| H  | -3.240400 | 0.057930  | 0.631780  |

Structure: IM11

-2009.716829 Hartree

0 1

|    |           |           |           |
|----|-----------|-----------|-----------|
| Zn | 1.083114  | 0.140042  | 0.005299  |
| C  | -3.430079 | -0.039121 | -0.562309 |
| C  | -3.088354 | -0.806099 | 0.469912  |
| H  | -3.335131 | -0.385338 | -1.586084 |
| H  | -3.822861 | 0.962445  | -0.422961 |
| H  | -1.179430 | 0.749437  | 0.097047  |
| H  | -3.188549 | -0.462021 | 1.493780  |
| H  | -2.701958 | -1.810475 | 0.330508  |
| O  | -0.331607 | 1.194616  | 0.215723  |
| O  | 2.557227  | -0.860142 | -0.045742 |
| H  | 3.040159  | -0.859788 | -0.876744 |

Structure: P

-1931.092015 Hartree

0 1

|    |           |           |           |
|----|-----------|-----------|-----------|
| Zn | -0.000001 | 0.000013  | 0.012744  |
| H  | -2.259220 | 0.523894  | 0.482487  |
| O  | -1.775358 | -0.083351 | -0.084195 |
| O  | 1.775349  | 0.083233  | -0.084287 |
| H  | 2.259313  | -0.523334 | 0.483047  |
